# Supplementary material for: The Epidome - a species-specific approach to assess the population structure and heterogeneity of Staphylococcus epidermidis colonization and infection
Source: PubMed Central journal article supplement (PMC7691061; doi:10.1186/s12866-020-02041-w), 2020-11-26

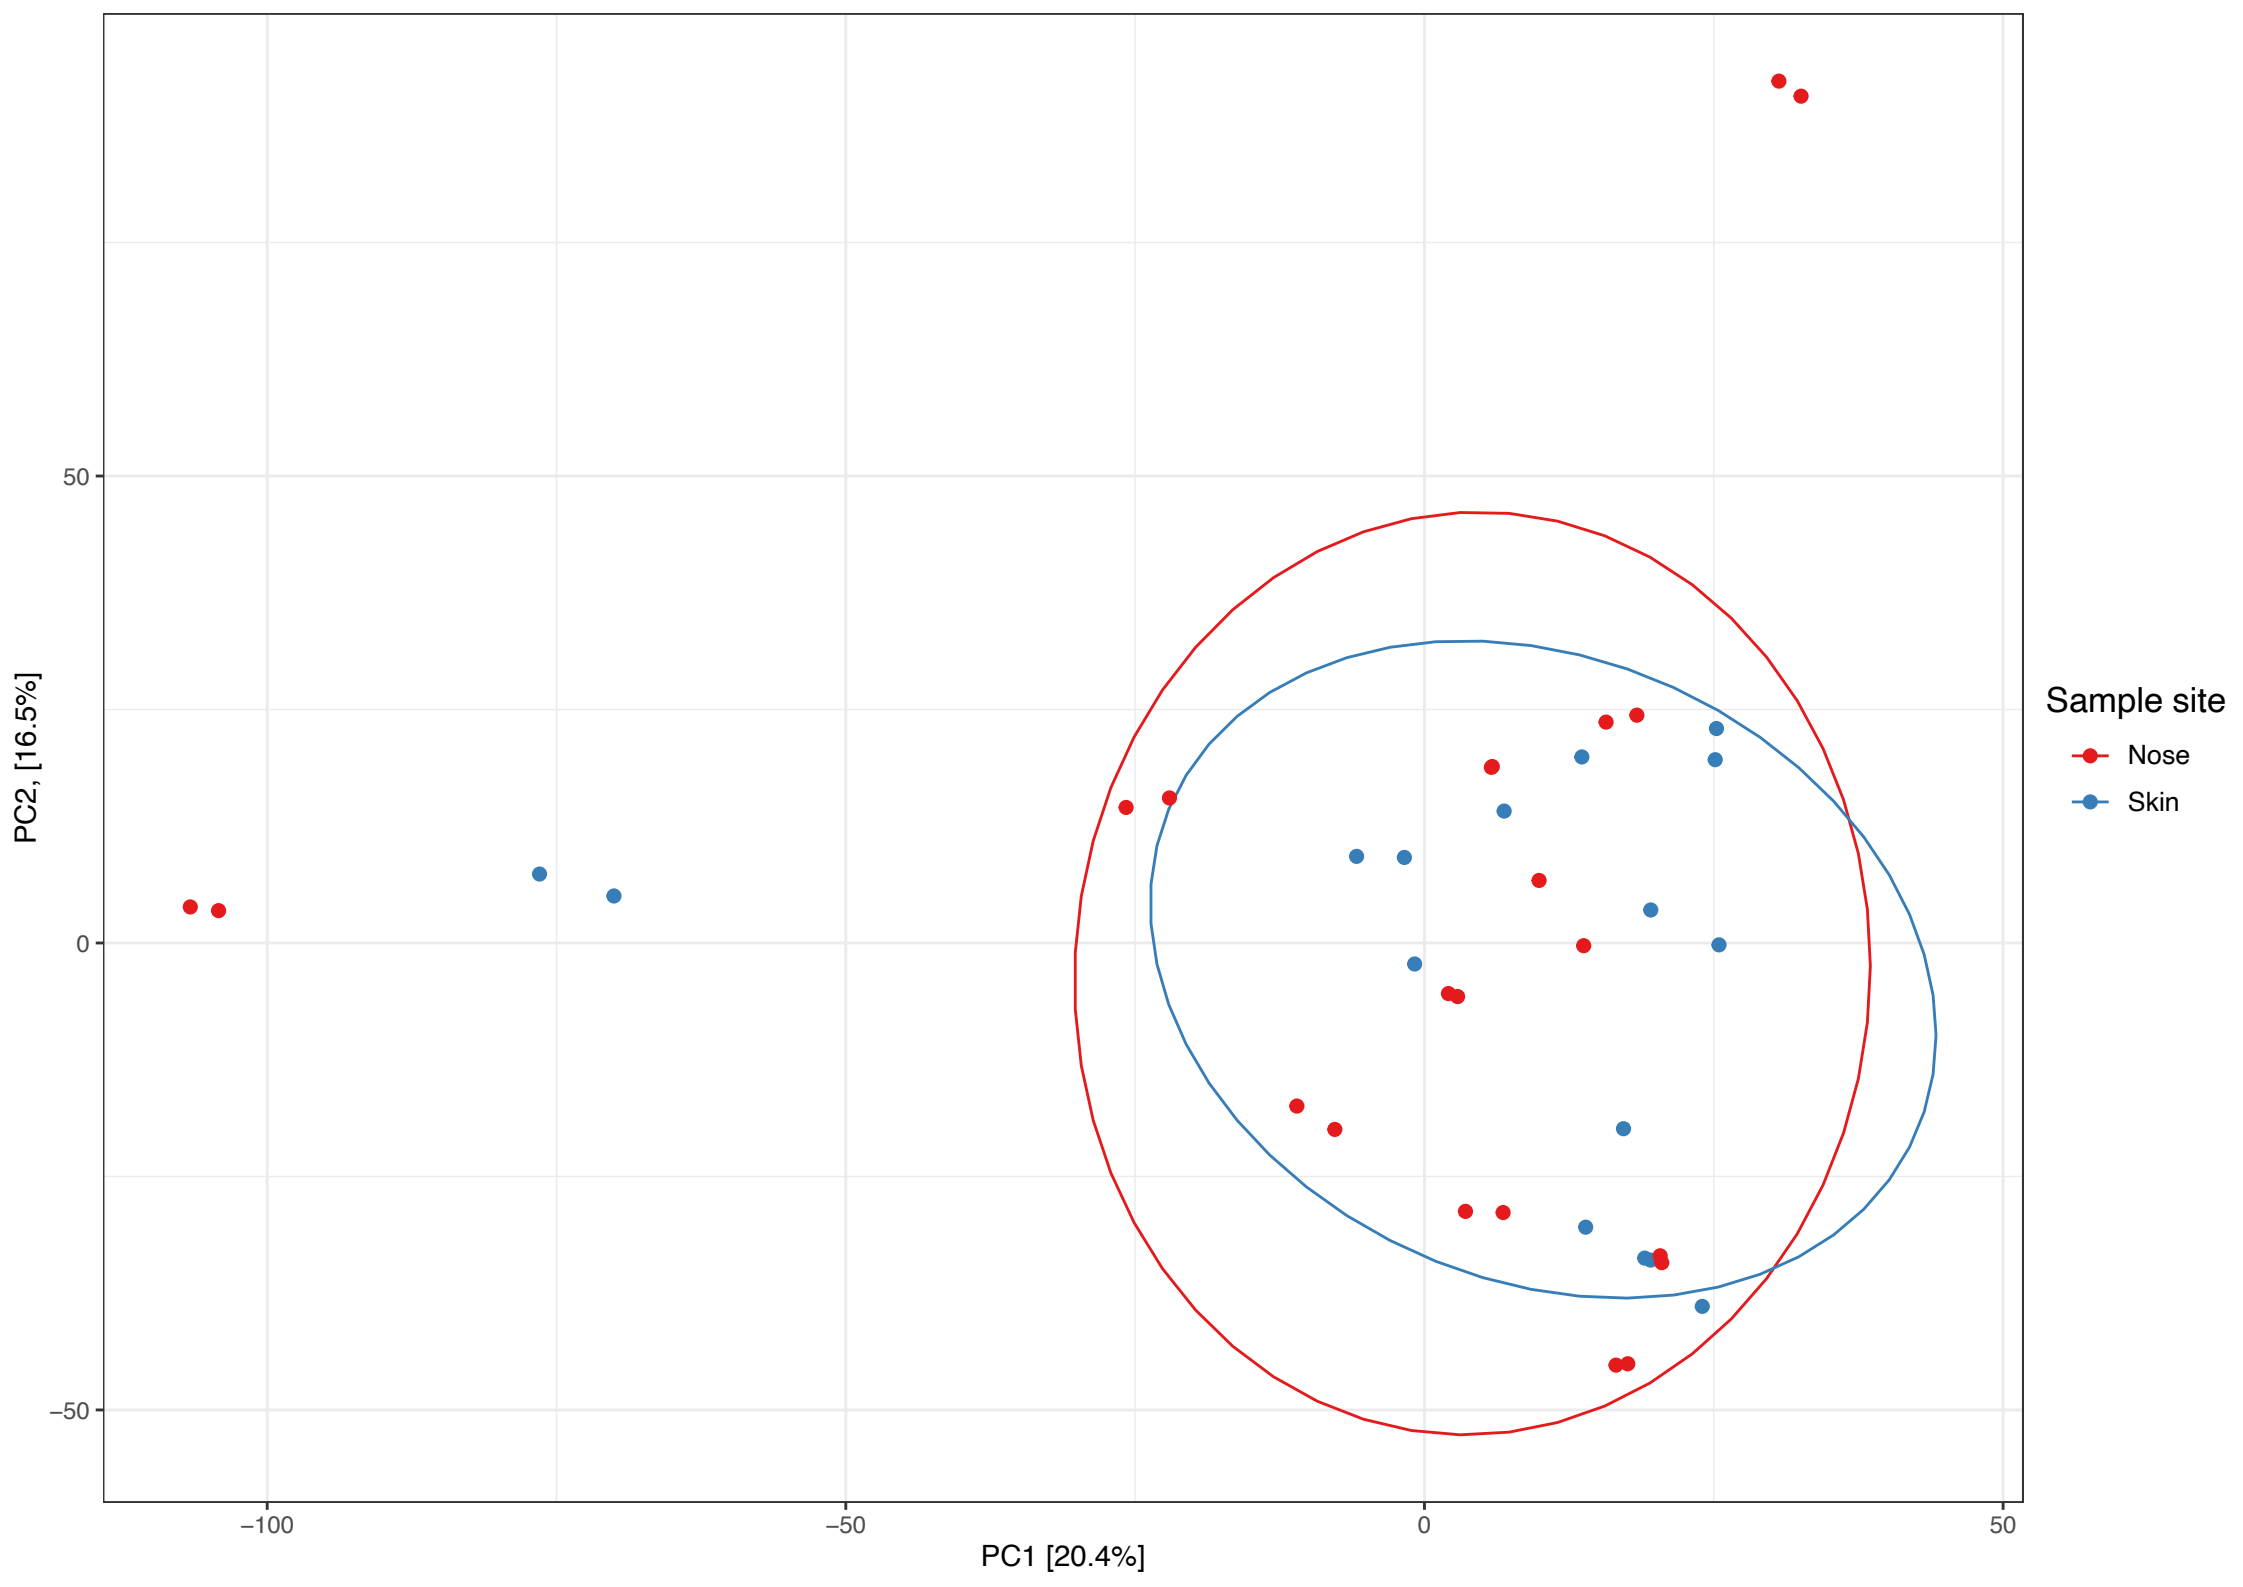

Supplement: 12866_2020_2041_MOESM3_ESM.pdf [file 12866_2020_2041_MOESM3_ESM.pdf]
